# Supplementary material for: Circulating T follicular regulatory and helper cells have memory-like properties
Source: JCI journal article supplement (doi:10.1172/jci76861), 2014-10-26

**Supplemental Figure 1** dLN and blood T<sub>FH</sub> and T<sub>FR</sub> cells in flu-infected mice. WT mice were infected with PR8-influenza. 10 days later dLN and blood were analyzed for ICOS on T<sub>FH</sub> cells (A) and T<sub>FR</sub> cells (B). Data are representative of 3 independent experiments.

**Supplemental Figure 2** DCs stimulate blood T<sub>FH</sub> and T<sub>FR</sub> differentiation.

(A-B) LPS-activated WT or *Ciita*<sup>-/-</sup> BMDCs were pulsed (NP-OVA) and subcutaneously transferred. 7 days later T<sub>FH</sub> (A) and T<sub>FR</sub> (B) cells were analyzed. Data are representative of 2 independent experiments.

**Supplemental Figure 3** Gates used to sort CXCR5<sup>+</sup>, T<sub>FH</sub> and/or T<sub>FR</sub> cells in studies.

All sorting was performed on an AriaII. Numbers indicate percent positive contained within gates.

**Supplemental Figure 4** Micrographs from transfer experiments described in Figure 4D and E. Scale bars= 20µm.

**Supplemental Figure 5** Cytokine quantification from suppression assays.

T<sub>FR</sub> cell suppression assays were performed as in Figure 7D and 6 days later culture supernatants were harvested and cytokines were measured by cytometric bead array.

Data are means +/- standard error of triplicate wells. Data are representative of at least 3 independent experiments.

A

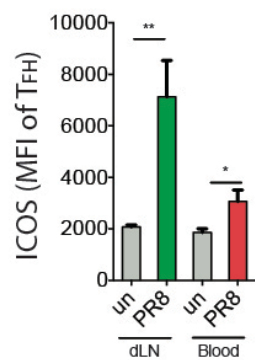

B

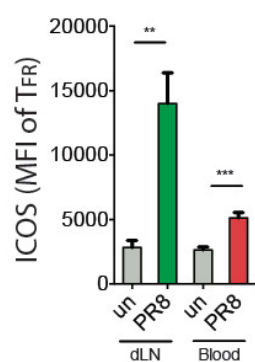

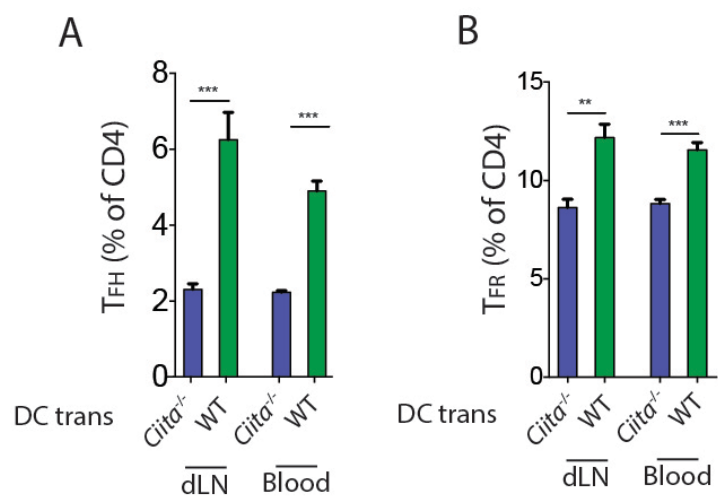

Sorting Tfr/Tfh from dLN  
using GITR (Fig 5, 7, 8, 9)

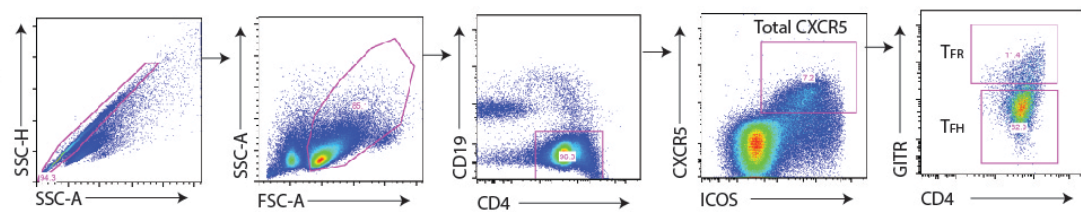

Sorting Tfh/Tfr from blood  
using GITR Fig 4 and 9

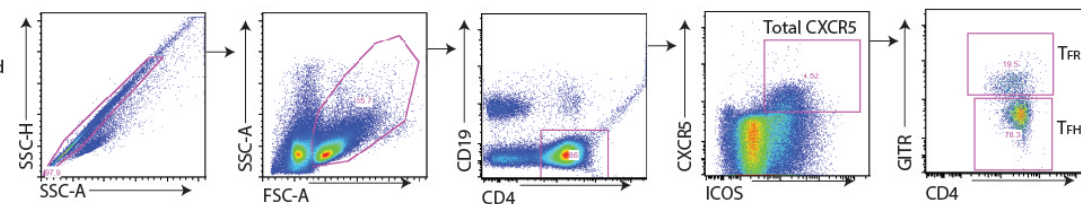

Sorting Tfh/Tfr from dLN  
using FoxP3 GFP  
Fig 7 and 8

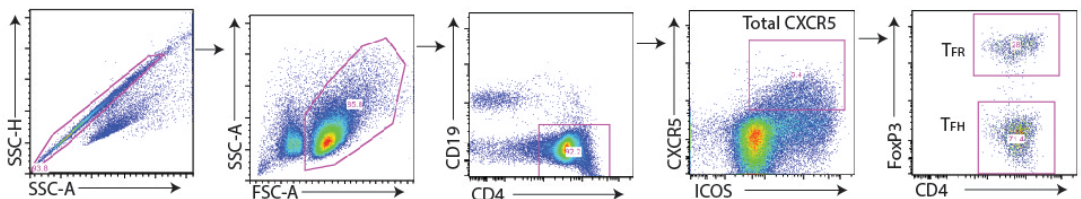

Sorting Tfh/Tfr from blood  
using CFP reporter and  
FoxP3 GFP Fig 4 and 6

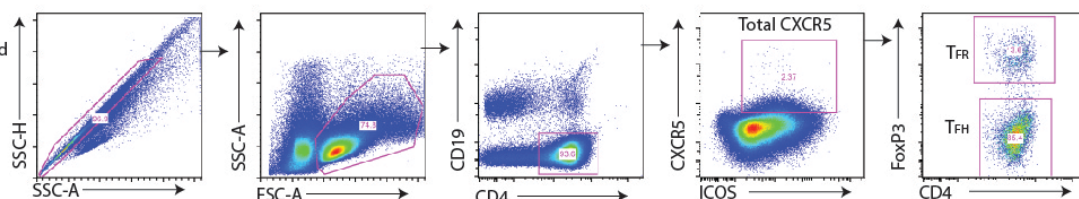

No Trans  
IgG1  
IgD

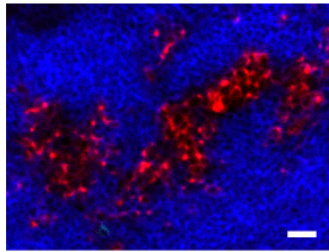

Blood T<sub>FH</sub>  
IgG1  
IgD

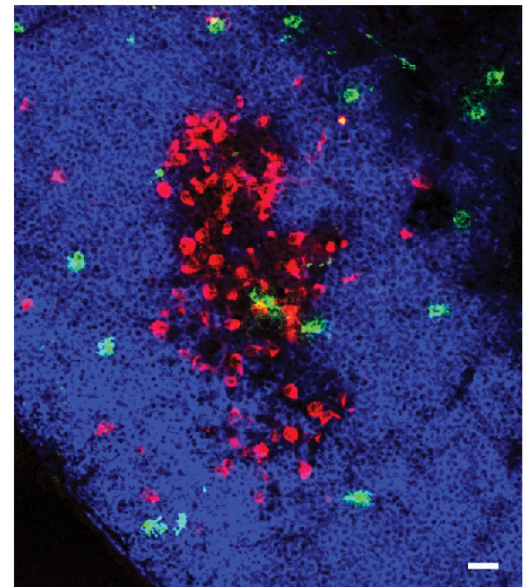

Blood T<sub>FH</sub>  
IgG1  
IgD

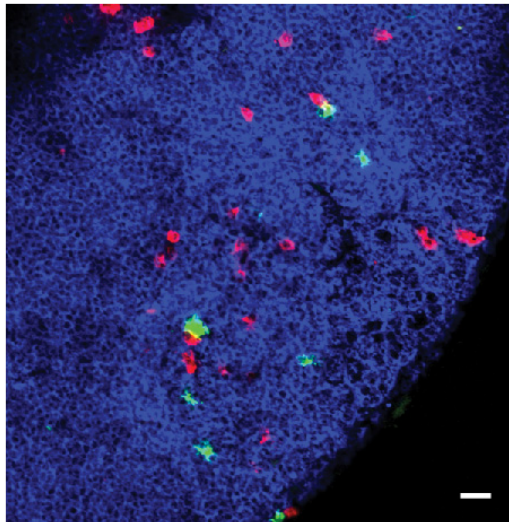

Blood T<sub>FH</sub>  
IgG1  
IgD

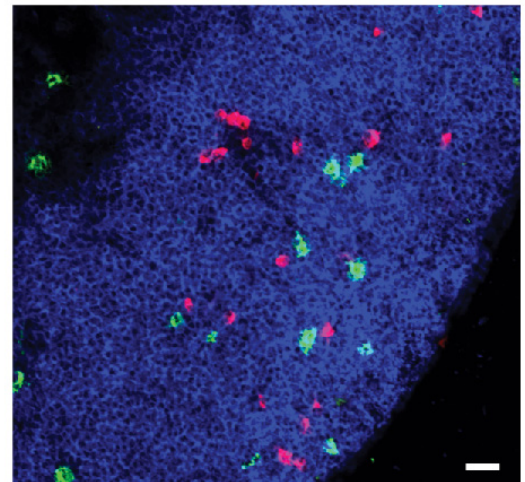

Blood T<sub>FR</sub>  
FoxP3  
IgG1

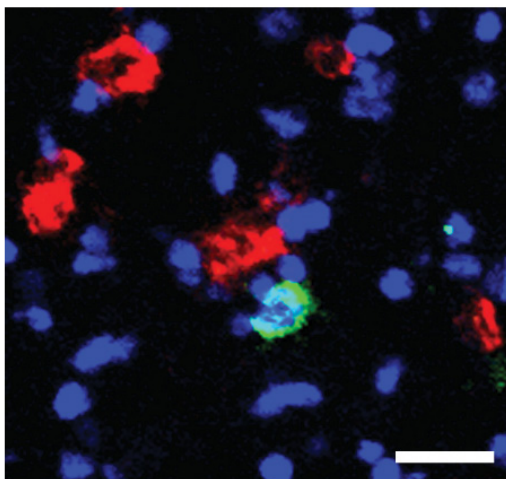

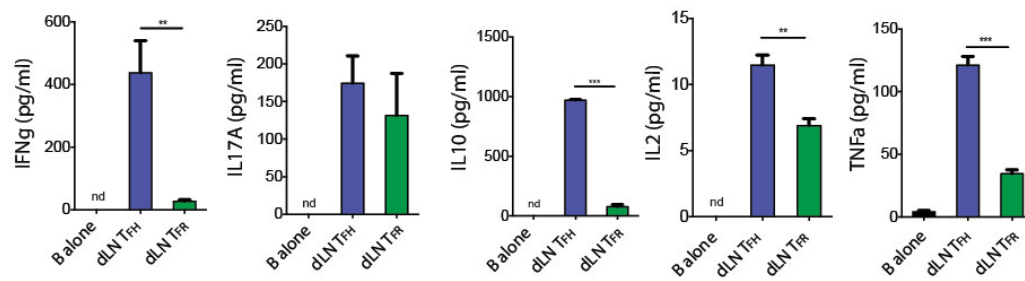

Supplement: sd1 [file 1]
